# Supplementary material
Source: MDPI journal article supplement (https://www.mdpi.com/2073-4441/14/22/3754)
Supplement: s1 [file s1]

# Nitrogen doped cobalt anchored on the used resin-based carbon ball catalyst to activate peroxymonosulfate for the degradation of ibuprofen

Cheng Wang <sup>a</sup>, Guangzhen Zhou <sup>a</sup>, Yanhua Xu <sup>a</sup>, Yongjun Sun <sup>b,\*</sup> and Peng Yu <sup>a</sup>

<sup>a</sup> School of Environmental Science and Engineering, Nanjing Tech University, Nanjing, 211816, China

<sup>b</sup> College of Urban Construction, Nanjing Tech University, Nanjing, 211816, China

\* Correspondence: Author: Yongjun Sun

Fax: +86-025-58139652

E-mail: sunyongjun@njtech.edu.cn

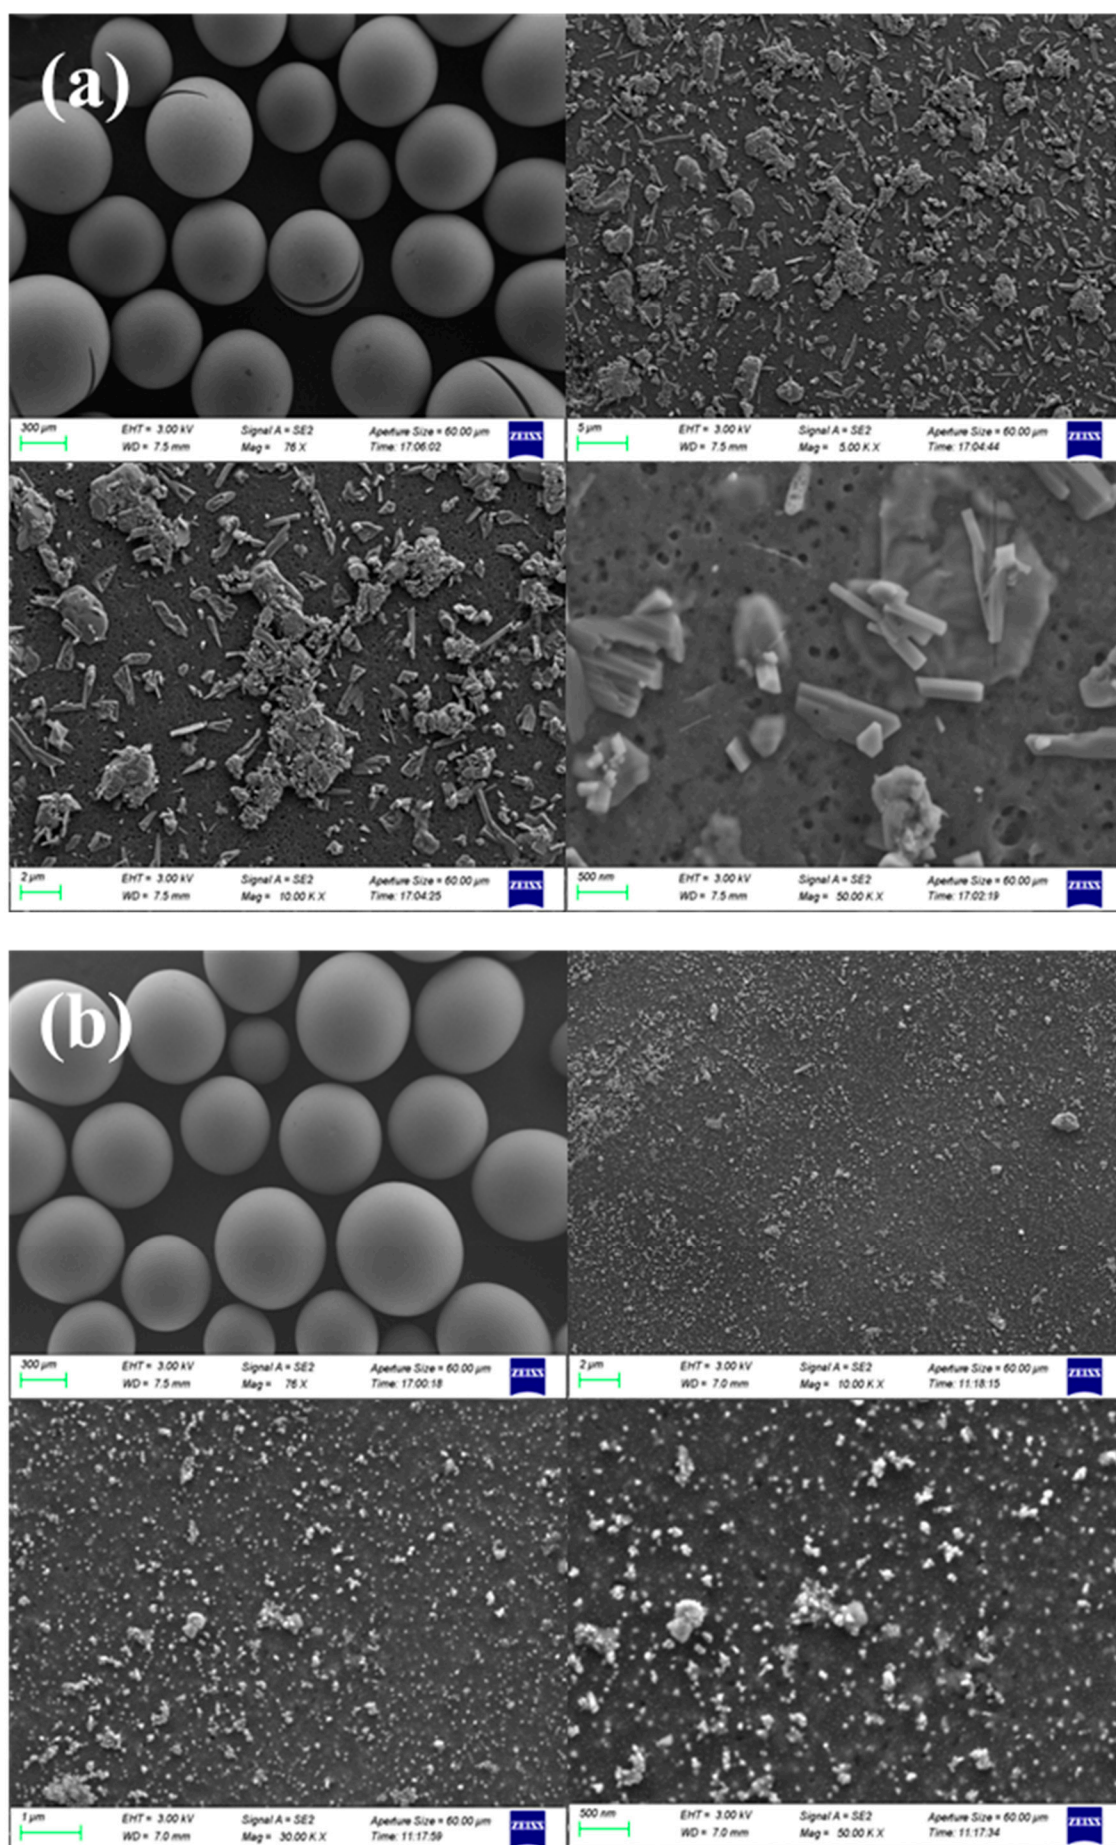

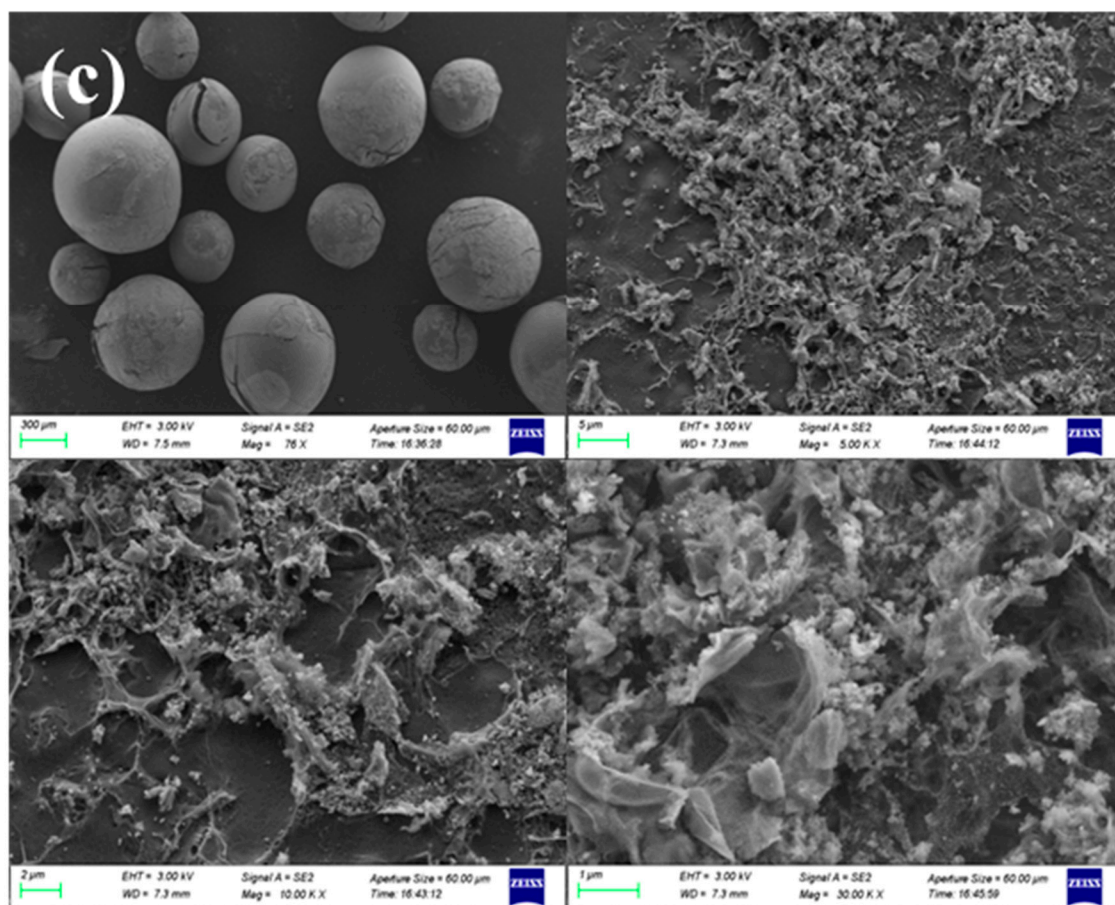

**Figure S1.** More SEM characterization graph of carbon ball materials; D001CB (a); Co/D001CB (b); N-Co/D001CB (c).

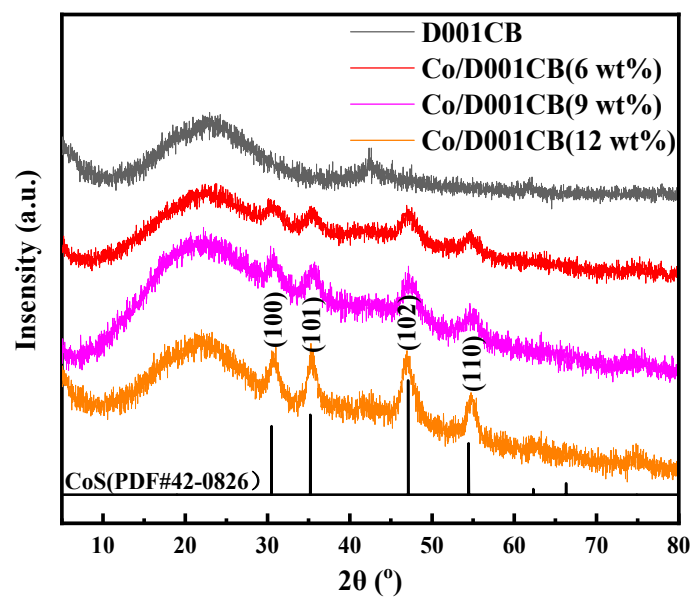

Figure S2. XRD of carbon spheres with different cobalt doping.

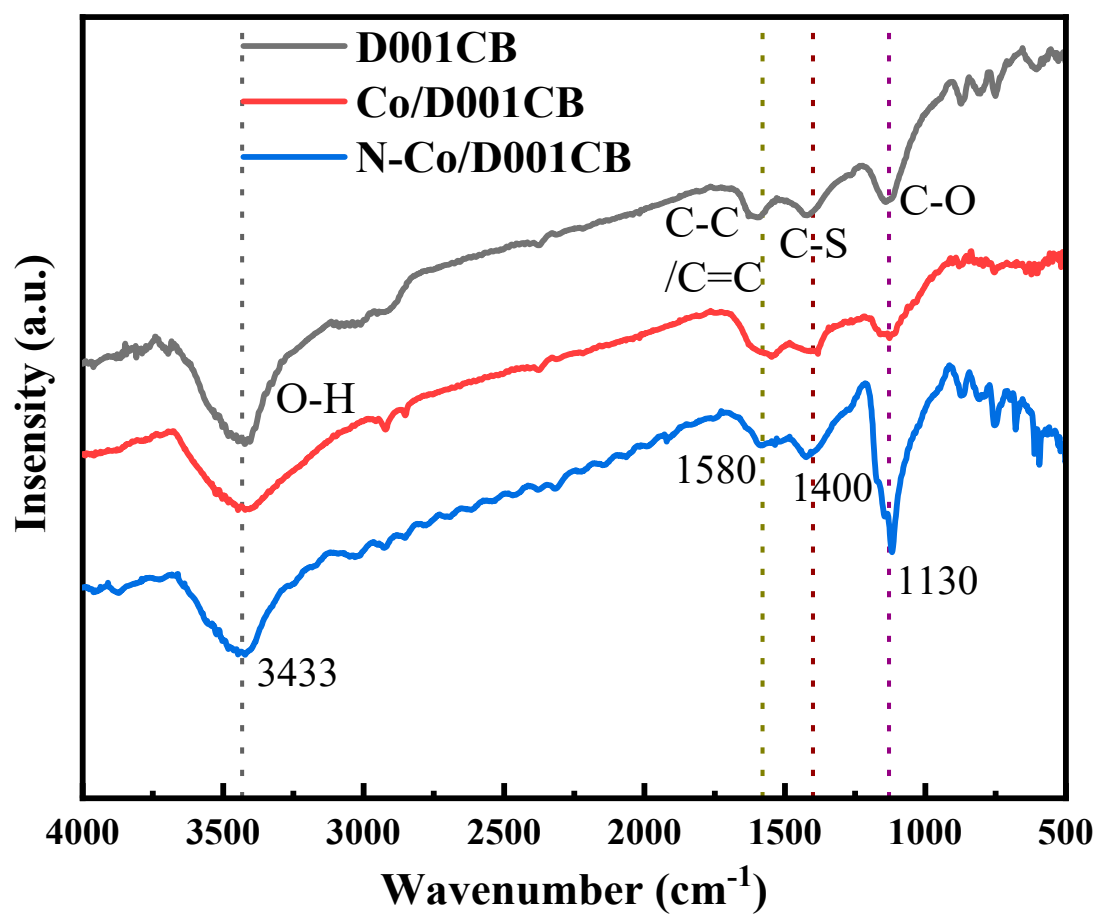

Figure S3. FT-IR spectrums of D001CB, Co/D001CB and N-Co/D001CB.

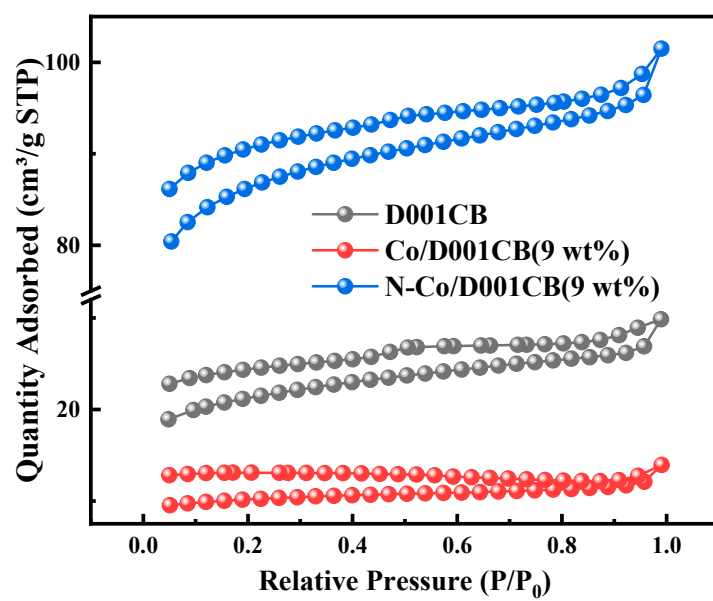

Figure S4. Nitrogen adsorption desorption curves of D001CB, Co/D001CB, N-Co/D001CB.

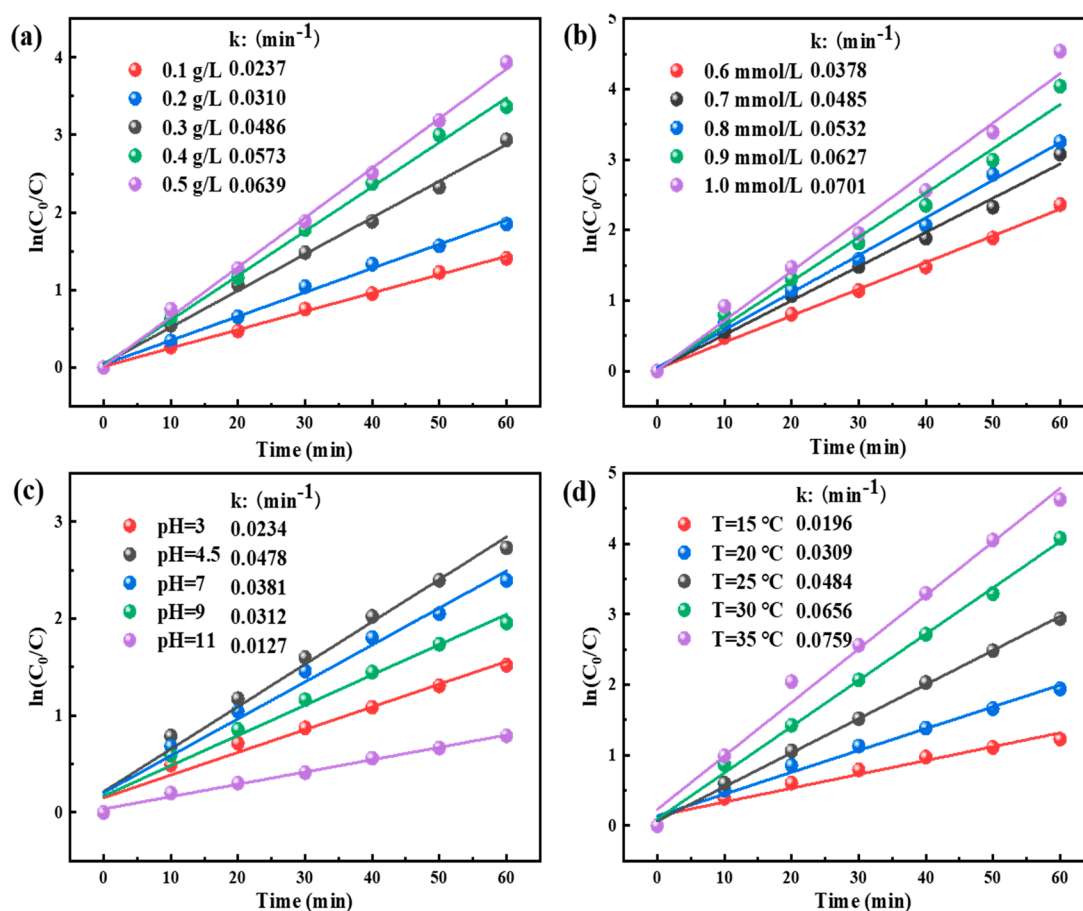

**Figure S5.** Kinetic fitting for the catalytic degradation of ibuprofen under different reaction conditions, catalyst loading (a, Temperature = 25 °C, pH = 4.5, PMS concentration = 0.7 mM, IBU concentration = 10 mg/L), PMS concentration (b, Temperature = 25 °C, pH = 4.5, catalyst loading = 0.3 g/L, IBU concentration = 10 mg/L), pH value (c, Temperature = 25 °C, PMS concentration = 0.7 mM, catalyst loading = 0.3 g/L, IBU concentration = 10 mg/L) and temperature (d, pH = 4.5, PMS concentration = 0.7 mM, catalyst loading = 0.3 g/L, IBU concentration = 10 mg/L) on the degradation of ibuprofen respectively.



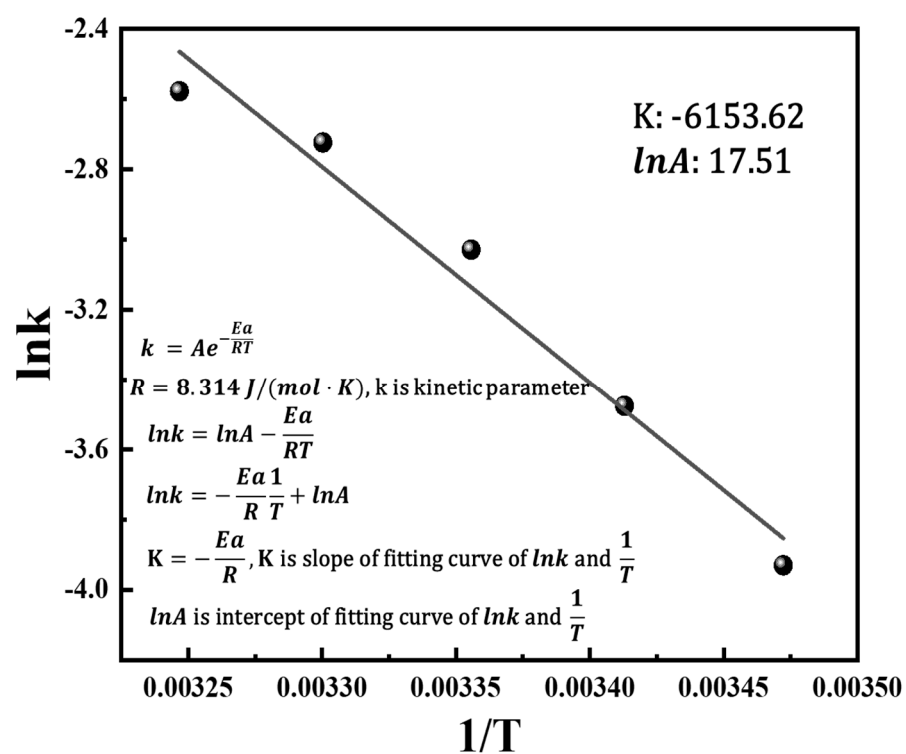

**Figure S6.** Linear fitting of the logarithmic value of kinetic constant ( $\ln k$ ) and the reciprocal of Kelvin temperature ( $1/T$ ), (pH = 4.5, PMS concentration = 0.7 mM, catalyst loading = 0.3 g/L, IBU concentration = 10 mg/L).



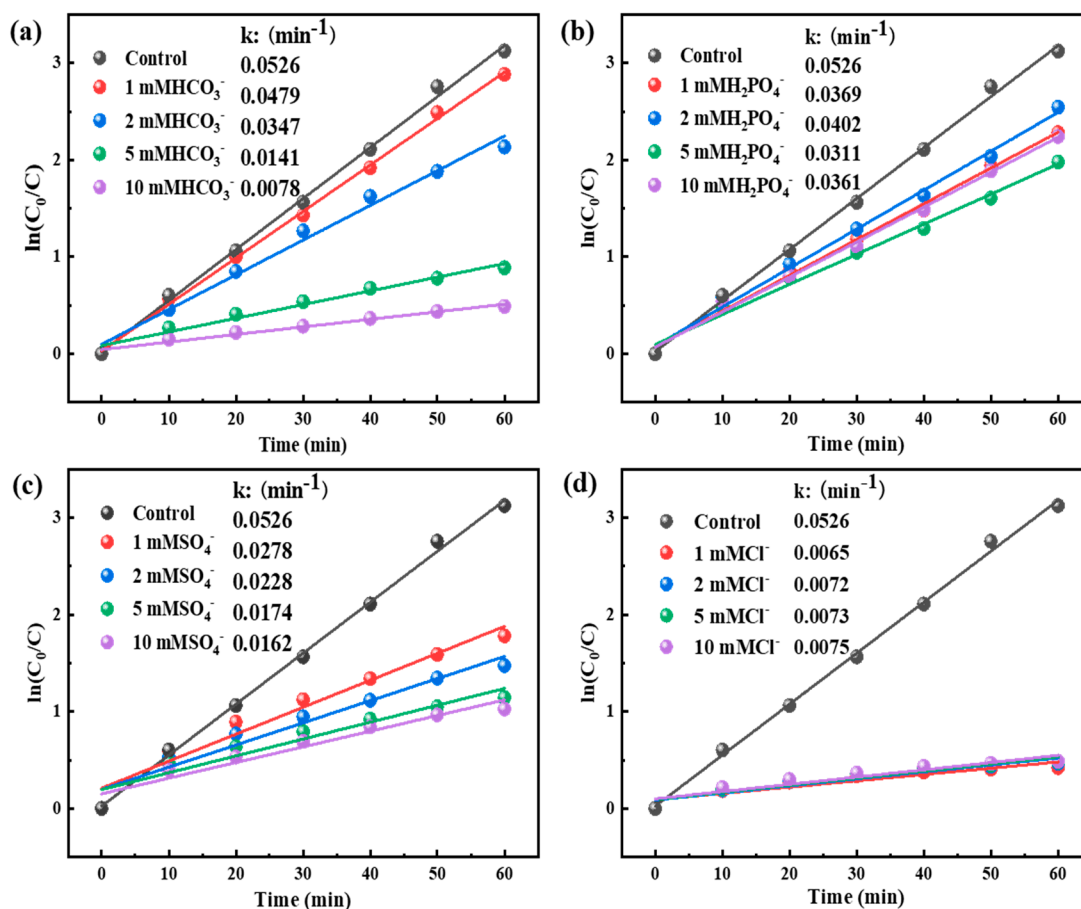

**Figure S7.** Kinetic fitting for the catalytic degradation of ibuprofen under different concentrations coexisting anion,  $\text{HCO}_3^-$  (a),  $\text{H}_2\text{PO}_4^-$  (b),  $\text{SO}_4^{2-}$  (c),  $\text{Cl}^-$  (d) on the degradation effect of ibuprofen respectively (Temperature = 25 °C, pH = 4.5, PMS concentration = 0.7 mM, catalyst loading = 0.3 g/L, IBU concentration = 10 mg/L).

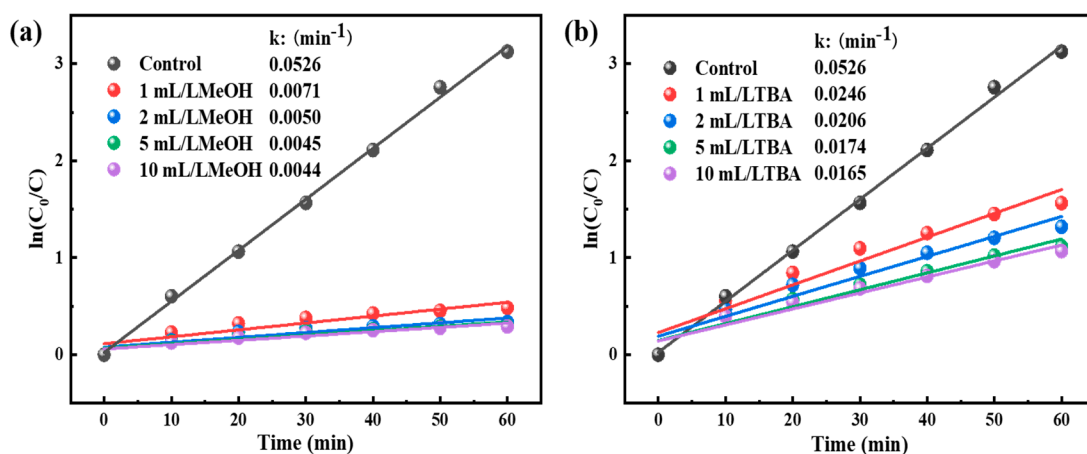

**Figure S8.** Kinetic fitting for the degradation of ibuprofen under different quenching environment, MeOH (a), TBA (b), (Temperature = 25 °C, pH = 4.5, PMS concentration = 0.7 mM, catalyst loading = 0.3 g/L, IBU concentration = 10 mg/L).

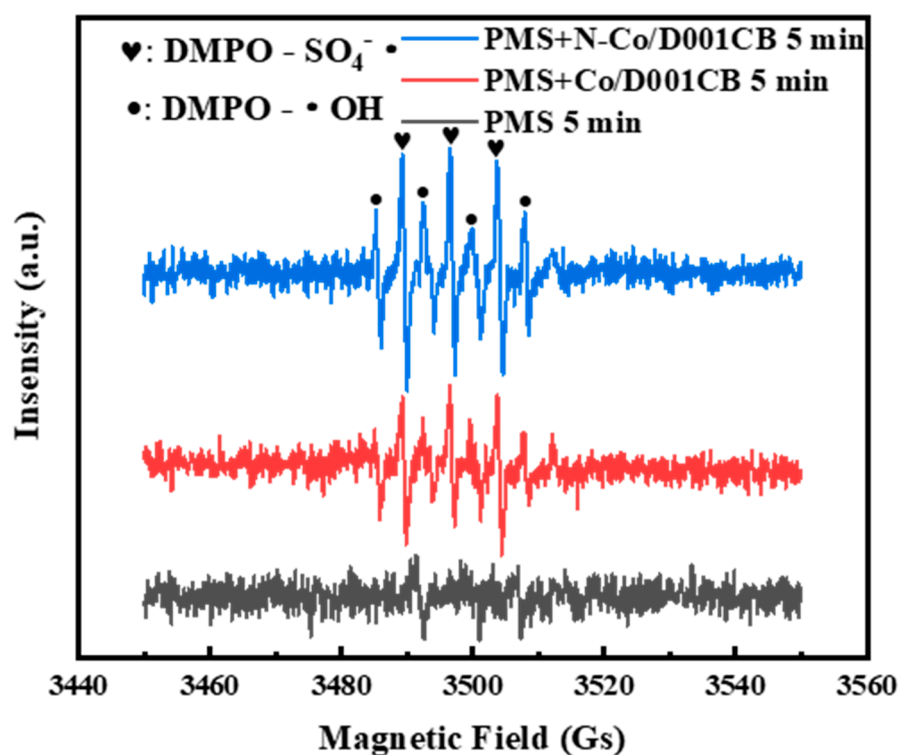

**Figure S9.** The EPR test with DMPO to detect  $\text{SO}_4^{\cdot -}$  and  $\cdot\text{OH}$ .

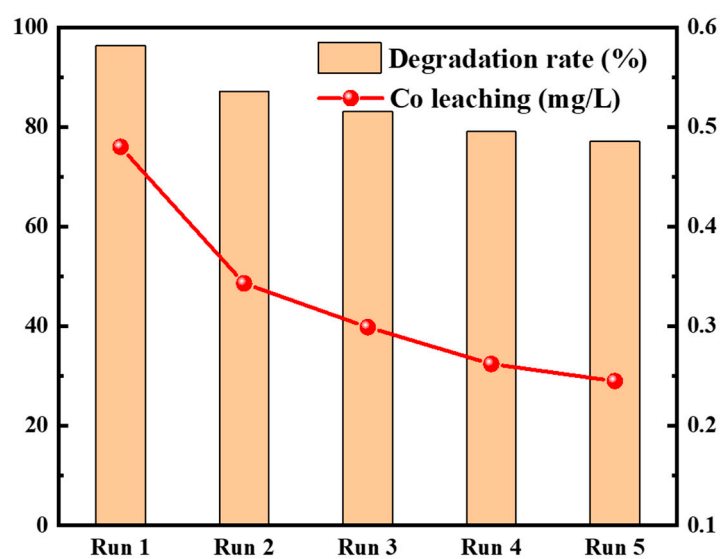

**Figure S10.** IBU degradation rates and cobalt ion leaching in the N-Co/D001CB in five runs (Temperature = 25 °C, pH = 4.5, PMS concentration = 0.7 mM, catalyst loading = 0.3 g/L, IBU concentration = 10 mg/L, recycled materials are both cleaned, dried and calcined).

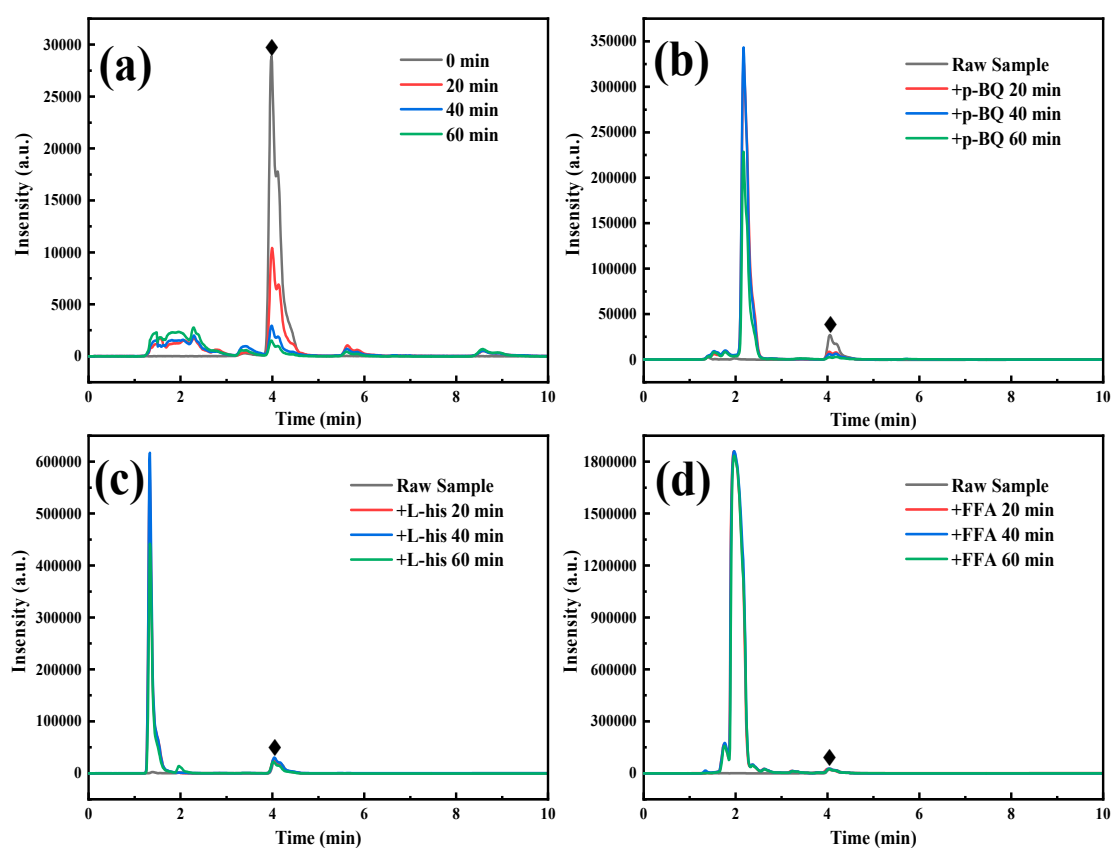

**Figure S11.** The Peak diagram of reaction liquid measured by HPLC in every 20min (a), and after added different quencher, 1 mmol/L p-BQ (b), 1 mmol/L L-his (c), 1 mL/L FFA (d), (Temperature = 25 °C, pH = 4.5, PMS concentration = 0.7 mM, catalyst loading = 0.3 g/L, IBU concentration = 10 mg/L).

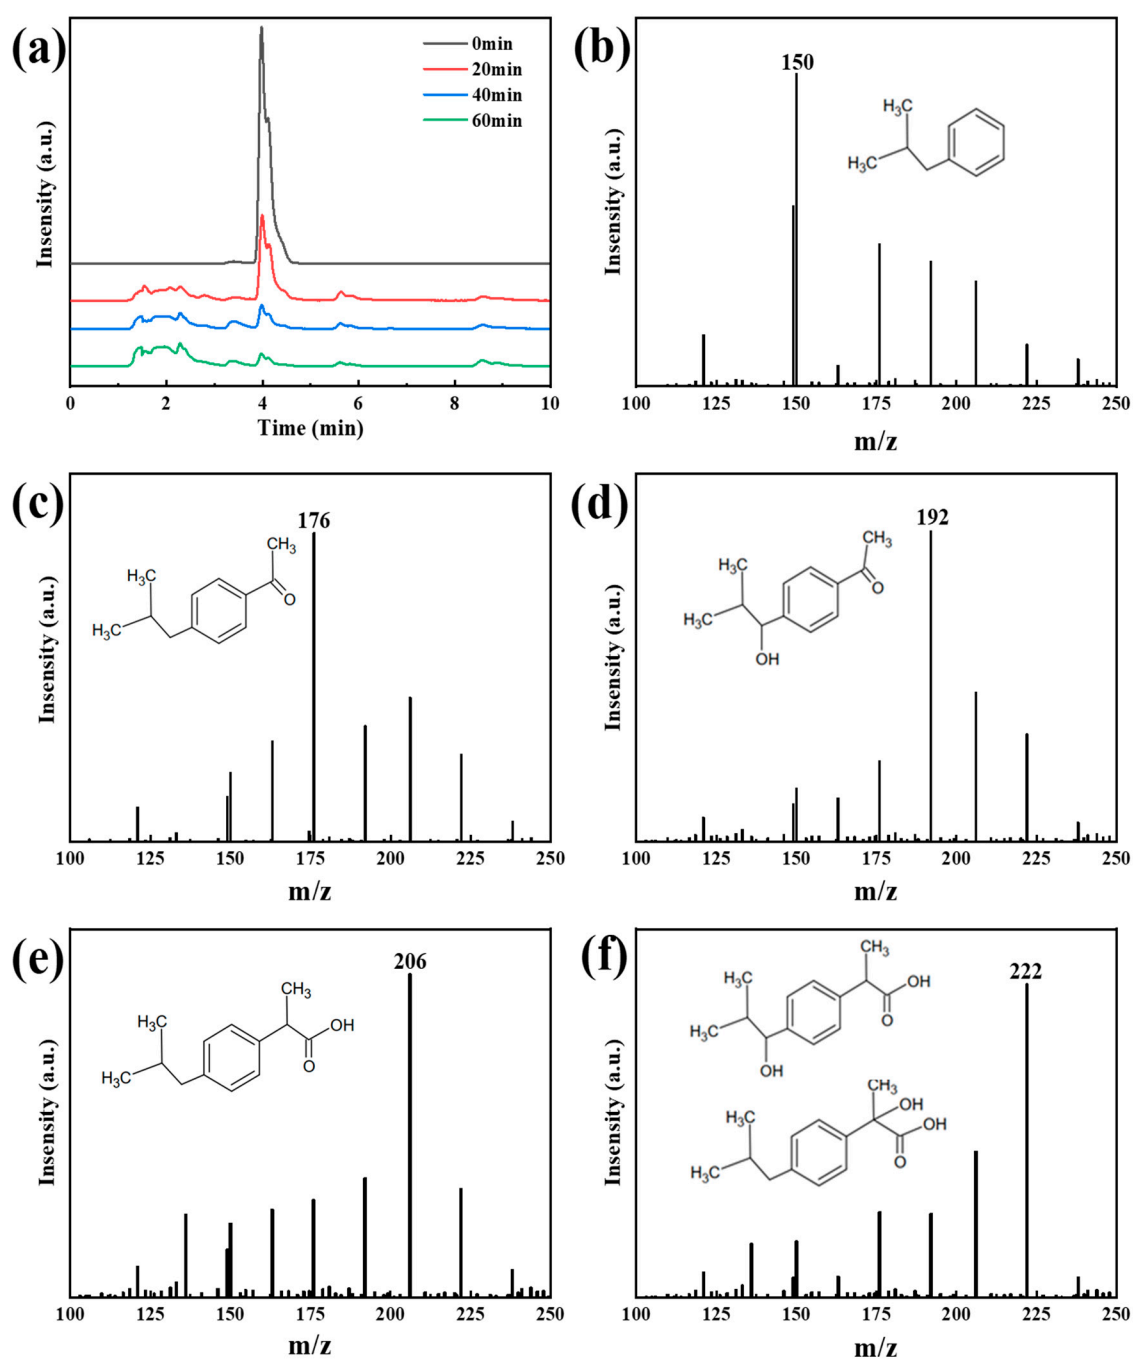

**Figure S12.** The Peak diagram of reaction liquid measured by HPLC (a), Liquid quality analysis map measured by LC-MS at the reaction time of 20 min (b-f).
